# Supplementary material for: Isolation of Human Induced Pluripotent Stem Cell-Derived Dopaminergic Progenitors by Cell Sorting for Successful Transplantation
Source: PubMed Central journal article supplement — Stem Cell Reports. 2014 Mar 6;2(3):337–50. doi: 10.1016/j.stemcr.2014.01.013 (PMC3964289; doi:10.1016/j.stemcr.2014.01.013), 2014-03-06
Supplement: mmc1.pdf [file mmc1.pdf]

## **Stem Cell Reports, Volume 2**

### **Supplemental Information**

#### **Isolation of Human Induced Pluripotent Stem**

#### **Cell-Derived Dopaminergic Progenitors**

#### **by Cell Sorting for Successful Transplantation**

Daisuke Doi, Bumpei Samata, Mitsuko Katsukawa, Tetsuhiro Kikuchi, Asuka Morizane, Yuichi Ono, Kiyotoshi Sekiguchi, Masato Nakagawa, Malin Parmar, and Jun Takahashi

Inventory of supplemental information

Supplemental experimental procedures

Figure S1, The dopaminergic differentiation of human iPSCs, related to Figures 1-2;

Figure S2, The purification and characterization of CORIN<sup>+</sup> cells, related to Figure 2;

Figure S3, The floating spheres derived from the unsorted or the d12-CORIN<sup>+</sup> cells, related to Figure 3;

Figure S4, The survival and function of DA neurons derived from the unsorted or the d12-CORIN<sup>+</sup> cells *in vivo*, related to Figure 5;

Figure S5, The microarray analysis comparing human fetal VM tissue and d12-CORIN<sup>+</sup> cells, related to Figure 6;

Table S1, Gene list of significantly up- and down-regulated genes of d12-CORIN<sup>+</sup> and unsorted cells, related to Figure S2;

Table S2, Gene list of significantly up- and down-regulated genes of d28-CORIN<sup>+</sup> and unsorted cells, related to Figure 6;

Table S3, Gene list of significantly up- and down-regulated genes of d28-CORIN<sup>+</sup> cells

compared with d42-CORIN<sup>+</sup> cells, related to Figure 6;

Table S4, Gene list of highly expressed genes either in d28 and d42-CORIN<sup>+</sup> cells, and human fetal VM tissue, related to Figures 6;

Table S5, List of primers for Q-PCR, related to Figures 1-2, 6, and S1-2;

Table S6, List of primary antibodies, related to Figures 1-5, S2, and S4

Figure S1

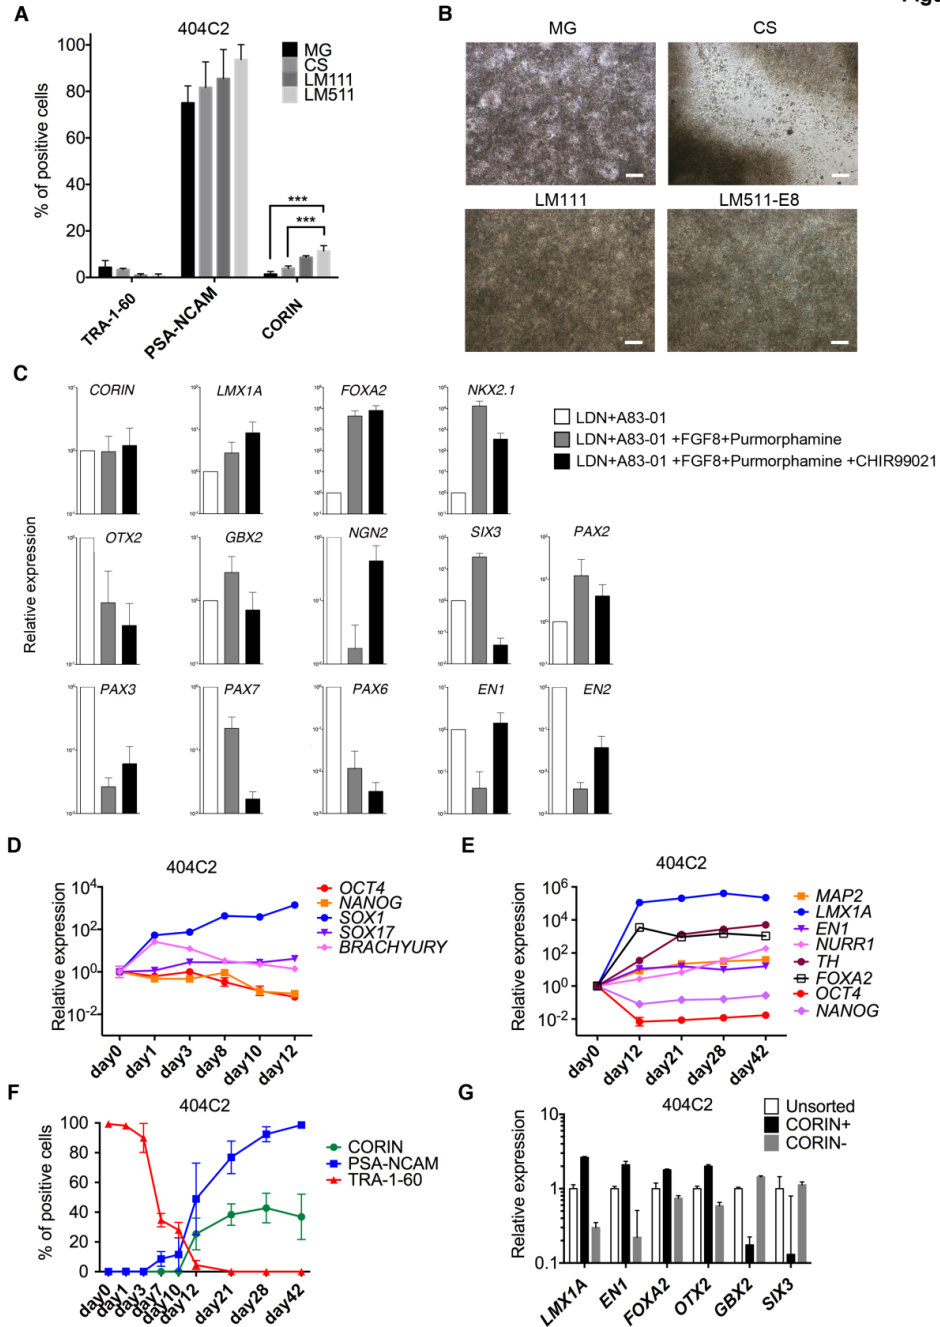

Figure S2

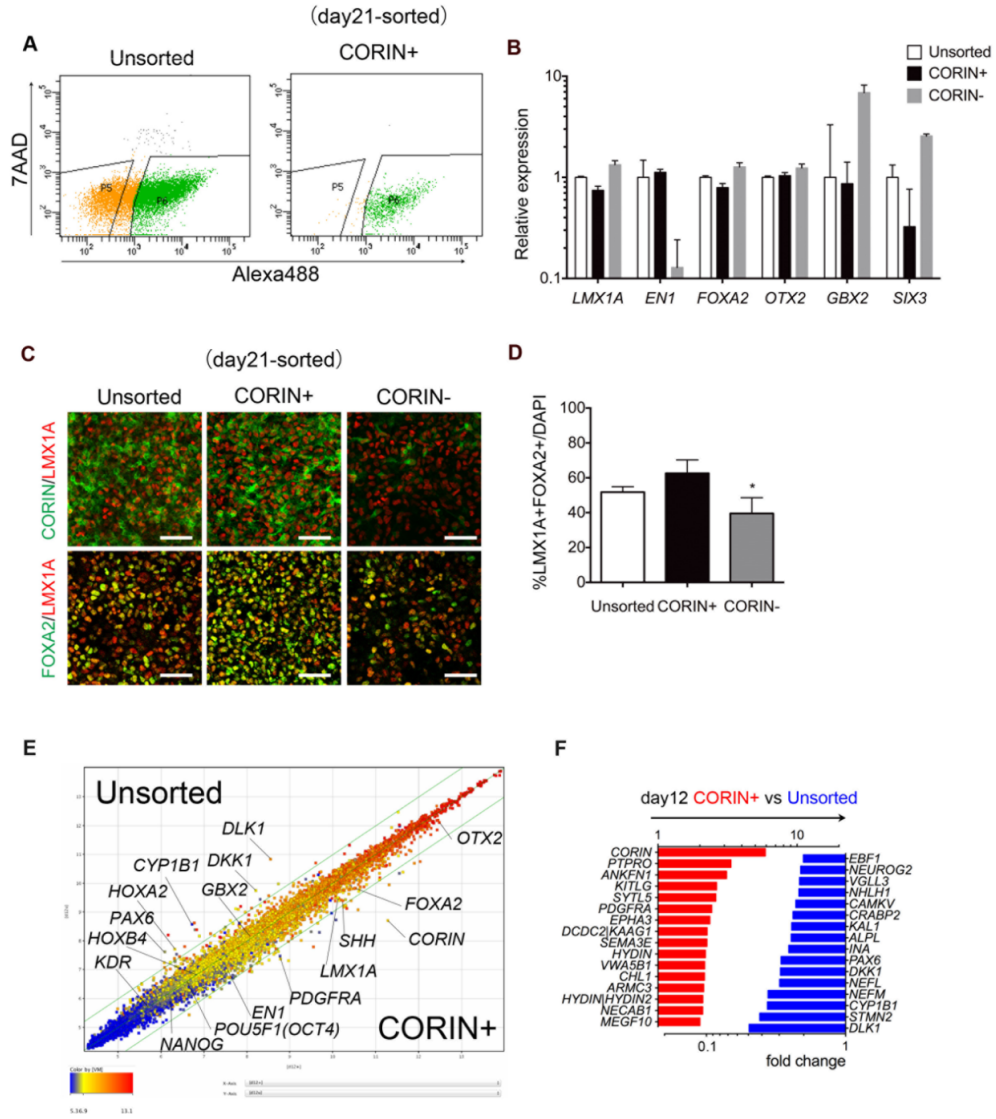

Figure S3

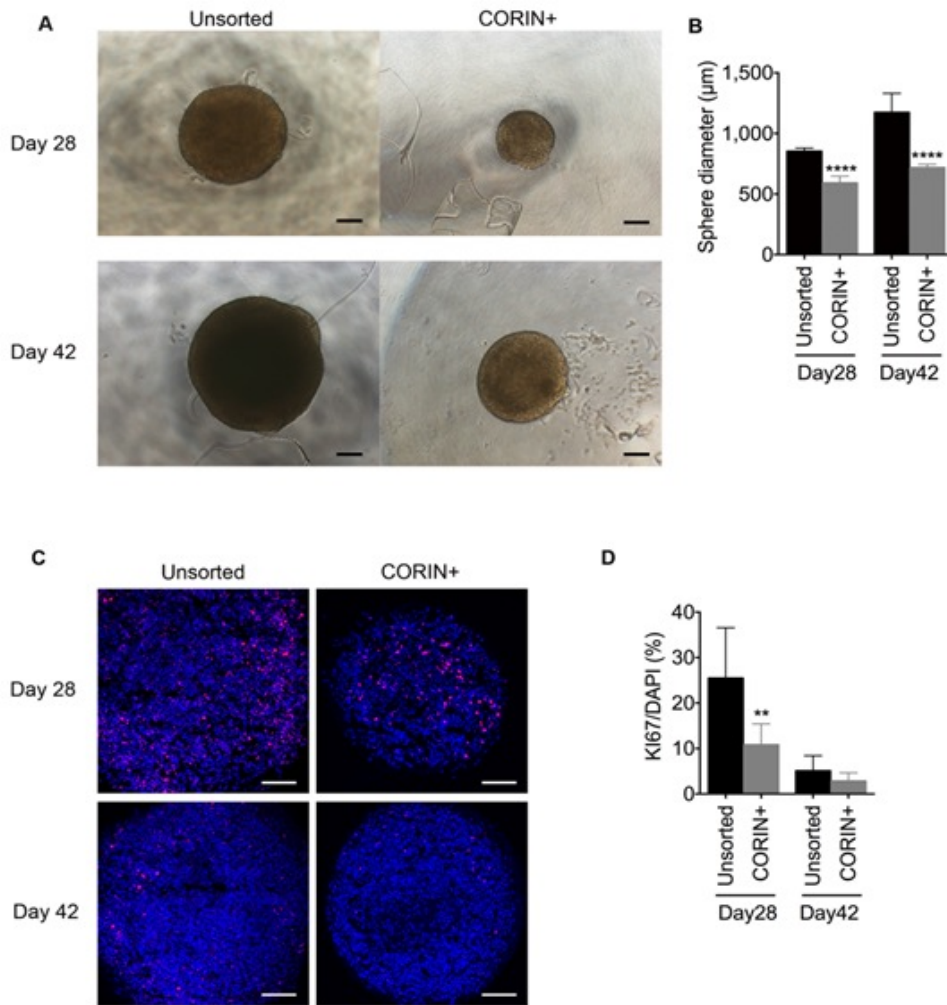

Figure S4

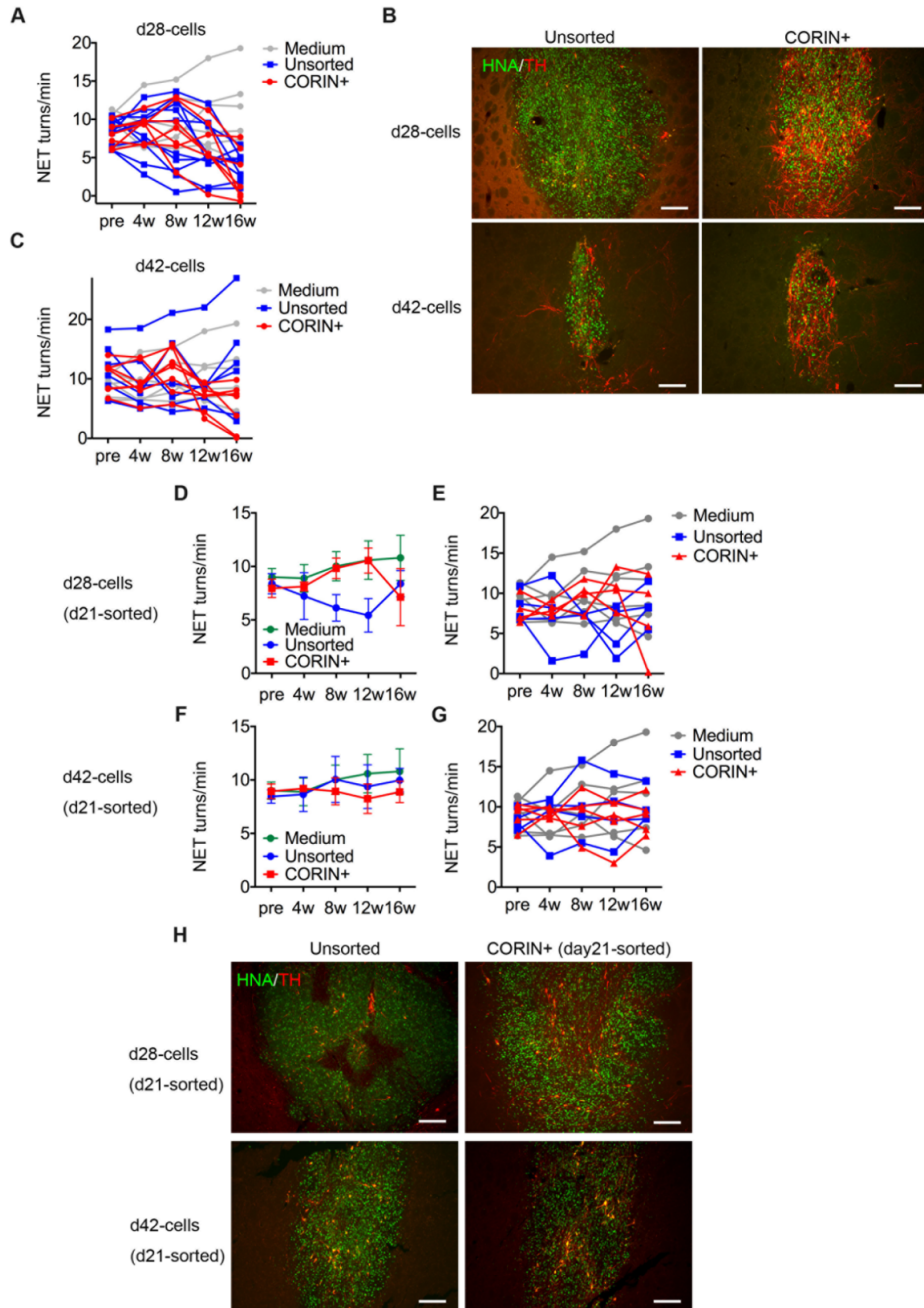

Figure S5

A

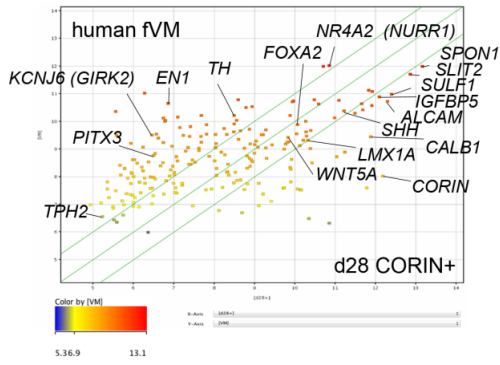

B

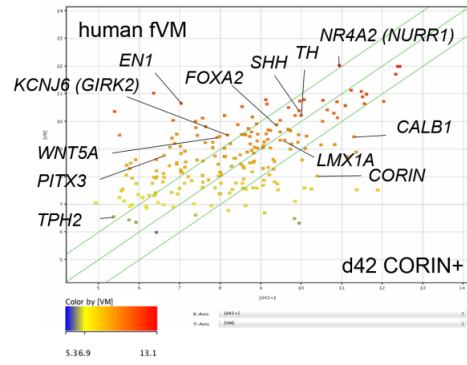

## Supplementary Figure Legends

### Figure S1

(A-C) The differentiation of human iPSCs induced by different culture conditions. (A) The results of the flow cytometric analysis of the differentiating cells (404C2) on Matrigel (MG), CellStart (CS), Laminin 111-E8 fragment (LM111) and Laminin 511-E8 fragment (LM511) on day 12. The values are the means  $\pm$  s.d. \*\*\* $p=0.0010$ , \*\*\* $p=0.0001$  by a one-way ANOVA with Tukey's multiple comparison test ( $n=3$  independent experiments). (B) Phase contrast images of the differentiating cells (404C2) on different matrices on day 12. Bar = 200  $\mu\text{m}$ . (C) The results of the quantitative RT-PCR of the differentiating cells (836B3) on day 12. FGF8 and Purmorphamine were added from day 1 to day 7. CHIR99021 was added from day 3 to day 12. The values are the means  $\pm$  s.d. ( $n=3$  independent experiments) (D-G) The differentiation of another human iPSC line (404C2) induced by attachment culture on LM511-E8. (D, E) The results of the quantitative RT-PCR of another human iPSC line (404C2). The expression level of undifferentiated cells (day 0) was set to 1. The values are the means  $\pm$  s.d. ( $n=3$  independent experiments) (F) The results of a temporal expression analysis by flow cytometry. The values are the means  $\pm$  s.d. ( $n=3$  independent experiments) (G) The results of the gene expression analysis by quantitative RT-PCR on day 12. The expression level of the unsorted cells was set to 1. The values are the means  $\pm$  s.d. ( $n=3$  independent experiments).



### Figure S2

(A-D) The purification and characterization of iPSC-derived CORIN<sup>+</sup> cells on day 21. (A) Dot plots of the FACS analysis of the unsorted and the reanalyzed sorted cells. (B) The results of the quantitative RT-PCR. The expression level of the unsorted cells was set to 1. The values are the means  $\pm$  s.d. (n=3 independent experiments). (C) Immunostaining for CORIN/LMX1A and FOXA2/LMX1A. Bar = 50  $\mu$ m. (D) The percentages of LMX1A<sup>+</sup>/FOXA2<sup>+</sup> cells per total cells. The values are the means  $\pm$  s.d. \*p = 0.0332 by a one way-ANOVA with Dunnett's multiple comparison test (n=15 totally, 5 spheres in each three independent experiment). (E-F) The results of the microarray analysis comparing the unsorted vs. CORIN<sup>+</sup> cells on day 12. (E) Scatter plot. (F) Selected lists of differentially expressed transcripts comparing day12-CORIN<sup>+</sup> cells versus day12-Unsorted cells.

### Figure S3

(A-B) The expansion of the floating spheres derived from the unsorted or the d12-CORIN<sup>+</sup> cells. (A) Phase contrast images of the spheres. Bar = 200  $\mu$ m. (B) The diameter of the spheres on day 28 or day 42. The values are the means  $\pm$  s.d. \*\*\*\*P<0.0001 by the unpaired t-test (n=30 totally, 10 spheres in each three independent experiment). (C) Double-labeled immunostaining of the spheres on day 28 and day42, for KI67 (red) and DAPI (blue). Bar=100 $\mu$ m. (D) The percentages of KI67 positive cells per DAPI. \*\*p=0.0012 by the unpaired t-test (n=5, three independent experiments).

#### **Figure S4**

(A-C) The survival and function of DA neurons derived from the unsorted or the d12-sorted cells, which were grafted on day 28 or day 42. (A) The metamphetamine-induced rotation of the individual rats with the grafts of d12-sorted, d28-grafted cells. (B) Immunofluorescence images of the grafts derived from d12-sorted or unsorted cells stained for HNA (green) and TH (red). Bar = 200  $\mu$ m. (C) The metamphetamine-induced rotation of the individual rats with the grafts of d12-sorted, d42-grafted cells. (D-H) The survival and function of the DA neurons derived from the unsorted or the d21-sorted cells, which were grafted on day 28 (n=4, D-E, and H) or day 42 (n=4 or 5, F-H). The metamphetamine-induced rotation of each group (D, F) or the individual rats with the grafts (E, G). The values are the means  $\pm$  s.d. There were no significant differences. (H) Immunofluorescence images of the grafts derived from d21-sorted or unsorted cells stained for HNA (green) and TH (red). Bar = 200  $\mu$ m.

#### **Figure S5**

(A-B) The results of the microarray analysis comparing human fetal VM tissue and d12-CORIN<sup>+</sup> cells cultured until day 28 (A) or day 42 (B). Only the genes whose expression levels were higher (> 2-fold) in the fetal VM compared to the fetal dorsal mesencephalon are plotted.

**Table S1:** Gene expression array data of significantly up-regulated and down-regulated genes of day 12-sorted and unsorted cells.

| Transcripts Cluster Id | Gene symbol         | Fold Change | P value     |
|------------------------|---------------------|-------------|-------------|
| 8100154                | <i>CORIN</i>        | 5.9087105   | 0.001171437 |
| 7954143                | <i>PTPRO</i>        | 3.3445656   | 0.005720456 |
| 8008609                | <i>ANKFN1</i>       | 3.113136    | 0.023851596 |
| 7965322                | <i>KITLG</i>        | 2.6410403   | 5.14E-04    |
| 8166747                | <i>SYTL5</i>        | 2.6041105   | 0.020840537 |
| 8095080                | <i>PDGFRA</i>       | 2.4332025   | 0.009164337 |
| 8081081                | <i>EPHA3</i>        | 2.3614557   | 6.84E-04    |
| 8124196                | <i>DCDC2/KAAG1</i>  | 2.2547202   | 0.042166963 |
| 8140650                | <i>SEMA3E</i>       | 2.2485685   | 0.00204914  |
| 8002446                | <i>HYDIN</i>        | 2.1930437   | 0.029688193 |
| 7898627                | <i>VWA5B1</i>       | 2.1673756   | 0.039200813 |
| 8077270                | <i>CHL1</i>         | 2.1607752   | 0.019023776 |
| 7926638                | <i>ARMC3</i>        | 2.1327724   | 0.032846447 |
| 8002470                | <i>HYDIN/HYDIN2</i> | 2.1010761   | 0.019100418 |
| 8147244                | <i>NECAB1</i>       | 2.0970535   | 0.002917092 |
| 8107722                | <i>MEGF10</i>       | 2.003543    | 0.010272147 |
| 8115543                | <i>EBF1</i>         | -2.0123506  | 0.014606911 |
| 8102368                | <i>NEUROG2</i>      | -2.1043627  | 0.018515356 |
| 8088979                | <i>VGLL3</i>        | -2.143269   | 0.015245302 |
| 7906597                | <i>NHLH1</i>        | -2.1650214  | 0.018702803 |
| 8087530                | <i>CAMKV</i>        | -2.2798698  | 0.005241052 |
| 7921099                | <i>CRABP2</i>       | -2.387901   | 0.007732119 |
| 8171248                | <i>KALI</i>         | -2.4381118  | 0.026552679 |
| 7898693                | <i>ALPL</i>         | -2.4576702  | 0.010827614 |
| 7930208                | <i>INA</i>          | -2.5598962  | 0.012995572 |
| 7947338                | <i>PAX6</i>         | -2.9077826  | 9.78E-04    |
| 7927631                | <i>DKK1</i>         | -2.938103   | 0.039719306 |

|         |               |            |             |
|---------|---------------|------------|-------------|
| 8149835 | <i>NEFL</i>   | -2.9777105 | 0.014127387 |
| 8145361 | <i>NEFM</i>   | -3.6068168 | 0.018645655 |
| 8051583 | <i>CYP1B1</i> | -3.639586  | 0.006571199 |
| 8147030 | <i>STMN2</i>  | -4.1421623 | 0.001145821 |
| 7976783 | <i>DLK1</i>   | -4.9302297 | 6.35E-04    |

**Table S2:** Gene expression array data of significantly up- and down-regulated genes of day 28 unsorted and sorted cells.

| Transcripts Cluster |                    |             |             |  |
|---------------------|--------------------|-------------|-------------|--|
| Id                  | Gene symbol        | Fold Change | P value     |  |
| 7922174             | <i>F5</i>          | 10.484556   | 0.00196464  |  |
| 8083770             | <i>OTOL1</i>       | 9.6624365   | 1.42E-04    |  |
| 7965410             | <i>DCN</i>         | 7.884093    | 0.011896186 |  |
| 8151341             | <i>TRPA1</i>       | 7.6784086   | 0.001152584 |  |
| 7938608             | <i>SPON1</i>       | 7.6015487   | 0.016960293 |  |
| 8133876             | <i>CD36</i>        | 7.270626    | 0.007745484 |  |
| 8083673             | <i>IQCJ SCHIP1</i> | 5.648684    | 0.006275537 |  |
| 8100154             | <i>CORIN</i>       | 5.5950904   | 0.003215429 |  |
| 7968650             | <i>C13orf36</i>    | 5.24648     | 1.71E-04    |  |
| 8106660             | <i>RASGRF2</i>     | 4.8150682   | 0.004273195 |  |
| 7965403             | <i>LUM</i>         | 4.2473927   | 0.005038001 |  |
| 8155849             | <i>ANXA1</i>       | 4.245879    | 0.019833442 |  |
| 8131506             | <i>NXPPI</i>       | 4.219527    | 0.00597194  |  |
| 7951565             | <i>ARHGAP20</i>    | 4.1601496   | 0.002754803 |  |
| 8059413             | <i>DOCK10</i>      | 4.1518664   | 3.33E-04    |  |
| 7939052             | <i>FIBIN</i>       | 4.1420884   | 0.013714803 |  |
| 7903227             | <i>PALMD</i>       | 4.1280413   | 3.67E-04    |  |
| 7974902             | <i>RHOJ</i>        | 4.0372086   | 0.001624118 |  |
| 8135341             | <i>FLJ23834</i>    | 3.9833305   | 0.00218651  |  |
| 8078397             | <i>CMTM8</i>       | 3.9323933   | 0.010555872 |  |
| 7961540             | <i>REGG</i>        | 3.9065168   | 0.035438724 |  |
| 8106088             | <i>CARTPT</i>      | 3.8127122   | 0.033124655 |  |
| 8177620             | <i>CARTPT</i>      | 3.8085206   | 0.03323086  |  |
| 8049394             | <i>TRPM8</i>       | 3.7984648   | 6.74E-05    |  |
| 8103260             | <i>DCHS2</i>       | 3.6421225   | 1.67E-04    |  |

|         |                     |           |             |
|---------|---------------------|-----------|-------------|
| 8074606 | <i>USP18 USP41</i>  | 3.5775964 | 0.002447678 |
| 8058450 | <i>GPR1</i>         | 3.5421739 | 0.004501217 |
| 8016841 | <i>TMEM100</i>      | 3.5418146 | 7.80E-04    |
| 8140984 | <i>HEPACAM2</i>     | 3.4895766 | 0.04710368  |
| 8112971 | <i>HAPLN1</i>       | 3.4394467 | 0.017581666 |
| 8076894 | <i>MLC1</i>         | 3.4351523 | 0.017575841 |
| 7968678 | <i>FREM2</i>        | 3.4215899 | 0.002215871 |
| 8146863 | <i>SULF1</i>        | 3.4094722 | 0.013414457 |
| 7982117 | <i>GABRG3</i>       | 3.3868933 | 1.08E-04    |
| 8106210 | <i>RGNEF</i>        | 3.304427  | 0.005593245 |
| 8144078 | <i>SHH</i>          | 3.3041658 | 0.002837645 |
| 8123744 | <i>F13A1</i>        | 3.1656961 | 0.004540503 |
| 8057463 | <i>CERKL</i>        | 3.150669  | 0.00264684  |
| 8082012 | <i>SLC15A2</i>      | 3.0829906 | 6.18E-04    |
| 8172204 | <i>MAOB</i>         | 3.0079098 | 0.018402645 |
| 8103415 | <i>C4orf18</i>      | 2.9358177 | 0.007976412 |
| 8080918 | <i>FAM19A1</i>      | 2.9149494 | 0.007067252 |
| 7939341 | <i>CD44</i>         | 2.9061434 | 0.003175953 |
| 8156373 | <i>FGD3</i>         | 2.9034407 | 9.70E-04    |
| 8081431 | <i>ALCAM</i>        | 2.9028459 | 0.007804133 |
| 8129924 | <i>TXLNB</i>        | 2.8827786 | 3.28E-04    |
| 8077323 | <i>CNTN4</i>        | 2.8760664 | 0.02836744  |
| 7934570 | <i>KCNMA1</i>       | 2.8699055 | 2.88E-04    |
| 8094743 | <i>RHOH</i>         | 2.8629174 | 0.004758834 |
| 7902425 | <i>ST6GALNAC3</i>   | 2.8499446 | 0.019802256 |
| 8152606 | <i>SNTB1</i>        | 2.7894716 | 0.004711483 |
| 8071809 | <i>GSTT2 GSTT2B</i> | 2.7526436 | 0.002886667 |
| 8074962 | <i>GSTT2 GSTT2B</i> | 2.7220402 | 0.003455543 |
| 8115234 | <i>ANXA6</i>        | 2.6939156 | 5.01E-04    |
| 7975482 | <i>RGS6</i>         | 2.6821022 | 0.02144372  |

|         |                    |           |             |
|---------|--------------------|-----------|-------------|
| 8091799 | <i>C3orf57</i>     | 2.6769505 | 0.002148048 |
| 8070567 | <i>TFF3</i>        | 2.6574645 | 0.004154954 |
| 7931977 | <i>ITIH5</i>       | 2.654886  | 0.004861879 |
| 7971077 | <i>POSTN</i>       | 2.640356  | 0.047866426 |
| 8070073 | <i>C21orf62</i>    | 2.619478  | 0.011550013 |
| 7962327 | <i>SLC2A13</i>     | 2.6159894 | 0.009402491 |
| 8004880 | <i>NTN1</i>        | 2.6156747 | 0.003578502 |
| 7898627 | <i>VWA5B1</i>      | 2.6053572 | 5.06E-04    |
| 8096160 | <i>ARHGAP24</i>    | 2.5978916 | 0.021238877 |
| 8104930 | <i>SLC1A3</i>      | 2.5914204 | 0.014512674 |
| 8094911 | <i>ATP10D</i>      | 2.5909886 | 0.007341558 |
| 8059470 | <i>IRS1</i>        | 2.5734465 | 0.013759398 |
| 7929732 | <i>CNNM1</i>       | 2.5726156 | 0.005757415 |
| 8094574 | <i>TBC1D1</i>      | 2.556988  | 0.001142018 |
| 8022655 | <i>AQP4</i>        | 2.5565944 | 0.028163102 |
| 8004571 | <i>EFNB3</i>       | 2.53976   | 0.007617007 |
| 8150138 | <i>TEX15</i>       | 2.5220304 | 0.002017324 |
| 8077299 | <i>CNTN6</i>       | 2.4851518 | 0.02012182  |
| 8146618 | <i>RLBP1L1</i>     | 2.4758441 | 0.035133276 |
| 7971104 | <i>TRPC4</i>       | 2.4724553 | 0.010214505 |
| 8156923 | <i>RP11-35N6.1</i> | 2.4619117 | 0.04837056  |
| 8140504 | <i>MAGI2</i>       | 2.4571788 | 0.011110543 |
| 7902158 | <i>TCTEX1D1</i>    | 2.4325416 | 0.033650953 |
| 8078405 | <i>CMTM7</i>       | 2.4290893 | 0.014074274 |
| 8166925 | <i>MAOA</i>        | 2.3981342 | 0.022063425 |
| 8008609 | <i>ANKFN1</i>      | 2.3975136 | 0.004701005 |
| 8107591 | <i>ZNF474</i>      | 2.3939266 | 0.014941976 |
| 8003667 | <i>SERPINF1</i>    | 2.3871253 | 0.002531932 |
| 7946946 | <i>TPH1</i>        | 2.3767436 | 0.014637796 |
| 8102440 | <i>ARSJ</i>        | 2.3724394 | 0.006457854 |

|         |                 |           |             |
|---------|-----------------|-----------|-------------|
| 8009277 | <i>RGS9</i>     | 2.361447  | 0.030142432 |
| 8088560 | <i>ADAMTS9</i>  | 2.3553352 | 0.006786053 |
| 8168163 | <i>GDPD2</i>    | 2.3540742 | 0.001182175 |
| 8145055 | <i>BMP1</i>     | 2.3463554 | 0.005386771 |
| 8127051 | <i>TRAM2</i>    | 2.338164  | 0.00365277  |
| 7910111 | <i>EPHX1</i>    | 2.3344667 | 0.010242027 |
| 7972177 | <i>POU4F1</i>   | 2.313673  | 0.00564285  |
| 8099476 | <i>PROM1</i>    | 2.3125432 | 0.023345044 |
| 8104394 | <i>ADCY2</i>    | 2.2996483 | 0.001288878 |
| 8154491 | <i>ADAMTSL1</i> | 2.2806952 | 0.012762848 |
| 8055239 | <i>CFC1</i>     | 2.2794826 | 0.02888268  |
| 8045198 | <i>CFC1B</i>    | 2.2759593 | 0.025898548 |
| 8062427 | <i>VSTM2L</i>   | 2.2596896 | 0.00186271  |
| 8149685 | <i>LGI3</i>     | 2.239012  | 0.009899134 |
| 8022559 | <i>ANKRD29</i>  | 2.2333395 | 0.01747538  |
| 8090214 | <i>SLC12A8</i>  | 2.2328575 | 0.012348623 |
| 8113103 | <i>C5orf36</i>  | 2.2270188 | 0.016636403 |
| 8113097 | <i>C5orf36</i>  | 2.22565   | 0.007570411 |
| 7940323 | <i>MS4A8B</i>   | 2.2047389 | 0.00314757  |
| 8100578 | <i>EPHA5</i>    | 2.1997414 | 0.047808312 |
| 7971526 | <i>HTR2A</i>    | 2.198441  | 0.001919438 |
| 8111887 | <i>PLCXD3</i>   | 2.1977108 | 0.005123412 |
| 7904293 | <i>PTGFRN</i>   | 2.1928596 | 0.00509188  |
| 8091537 | <i>IGSF10</i>   | 2.1908095 | 0.016658626 |
| 8081548 | <i>PVRL3</i>    | 2.1779037 | 0.001697615 |
| 7944603 | <i>GRIK4</i>    | 2.1769218 | 0.005746446 |
| 7933194 | <i>CXCL12</i>   | 2.1688948 | 0.001198161 |
| 8115122 | <i>CAMK2A</i>   | 2.159405  | 0.024350988 |
| 8148040 | <i>MAL2</i>     | 2.1570866 | 0.031561263 |
| 8082767 | <i>TMEM108</i>  | 2.1567624 | 0.039613348 |



|         |                 |            |             |
|---------|-----------------|------------|-------------|
| 8169711 | <i>GLUD2</i>    | 2.1501238  | 0.014982611 |
| 8051241 | <i>ALK</i>      | 2.1448784  | 0.013208308 |
| 7979529 | <i>KCNH5</i>    | 2.1385012  | 0.011208067 |
| 8057677 | <i>SLC40A1</i>  | 2.130094   | 0.019588992 |
| 8114287 | <i>SPOCK1</i>   | 2.1280315  | 0.033314068 |
| 8115875 | <i>DRD1</i>     | 2.1213698  | 0.003141733 |
| 7978492 | <i>HEATR5A</i>  | 2.1200593  | 0.04196309  |
| 8150419 | <i>ZMAT4</i>    | 2.1137774  | 0.012065756 |
| 7950307 | <i>UCP2</i>     | 2.1111689  | 0.005334504 |
| 7926506 | <i>CACNB2</i>   | 2.1078508  | 0.008176062 |
| 8096335 | <i>HERC6</i>    | 2.1024654  | 0.013722494 |
| 8099593 | <i>KCNIP4</i>   | 2.1012115  | 0.038529713 |
| 7897966 | <i>C1orf158</i> | 2.097635   | 0.031287834 |
| 8018646 | <i>FOXJ1</i>    | 2.0910397  | 0.02227275  |
| 8046815 | <i>ZNF804A</i>  | 2.0804143  | 0.005424841 |
| 8141076 | <i>PON2</i>     | 2.0797234  | 0.009371994 |
| 7972021 | <i>TBC1D4</i>   | 2.0627003  | 0.001612802 |
| 8157922 | <i>LMX1B</i>    | 2.0433998  | 0.006663436 |
| 8115756 | <i>KCNMB1</i>   | 2.041059   | 0.00110294  |
| 8154512 | <i>ADAMTSL1</i> | 2.040122   | 9.77E-04    |
| 7965322 | <i>KITLG</i>    | 2.0390725  | 0.02017616  |
| 8094134 | <i>USP17L6P</i> | 2.0383346  | 0.026872892 |
| 8122099 | <i>ENPP1</i>    | 2.0132759  | 0.007932335 |
| 7924636 | <i>TMEM63A</i>  | 2.0101945  | 0.002524594 |
| 8065344 | <i>FOXA2</i>    | 2.0030603  | 0.046765033 |
| 8002403 | <i>MTSS1L</i>   | 2.0025082  | 0.013355245 |
| 8161919 | <i>TLE1</i>     | -2.005099  | 3.05E-04    |
| 8114845 | <i>PRELID2</i>  | -2.0218534 | 0.006494959 |
| 8106743 | <i>VCAN</i>     | -2.0227196 | 0.002522825 |
| 7918891 | <i>NHLH2</i>    | -2.0330408 | 0.015749276 |

|         |                 |            |             |
|---------|-----------------|------------|-------------|
| 7936856 | <i>CHST15</i>   | -2.0386324 | 0.013191681 |
| 8042830 | <i>MTHFD2</i>   | -2.0551112 | 0.010851565 |
| 8145361 | <i>NEFM</i>     | -2.0610816 | 0.039704736 |
| 7960865 | <i>SLC2A3</i>   | -2.0629818 | 0.011180702 |
| 8141950 | <i>RELN</i>     | -2.0684507 | 0.015906759 |
| 8179519 | <i>HLA-DPBI</i> | -2.08239   | 0.034210023 |
| 7939102 | <i>ELP4</i>     | -2.0972288 | 0.025683006 |
| 7956401 | <i>SHMT2</i>    | -2.0974576 | 0.006639031 |
| 7956395 | <i>NXPH4</i>    | -2.098063  | 0.007471058 |
| 8113981 | <i>P4HA2</i>    | -2.0993407 | 0.015287149 |
| 8121784 | <i>FABP7</i>    | -2.1035392 | 0.02041487  |
| 7999387 | <i>EMP2</i>     | -2.112551  | 0.009035104 |
| 7922717 | <i>RGS16</i>    | -2.1209857 | 0.009994529 |
| 8103728 | <i>HMGB2</i>    | -2.132948  | 0.001998046 |
| 8161265 | <i>IGFBPL1</i>  | -2.1589382 | 0.022531271 |
| 8001329 | <i>CBLN1</i>    | -2.1598804 | 0.04133884  |
| 8140955 | <i>CDK6</i>     | -2.1889746 | 0.030694377 |
| 8175234 | <i>GPC3</i>     | -2.1954863 | 0.036012586 |
| 7922807 | <i>GLT25D2</i>  | -2.1960945 | 0.01720048  |
| 7957570 | <i>PLXNC1</i>   | -2.2013931 | 0.012180514 |
| 7980605 | <i>KCNK10</i>   | -2.210973  | 0.02661182  |
| 8103094 | <i>NR3C2</i>    | -2.2212284 | 0.009560429 |
| 7969613 | <i>GPC6</i>     | -2.2233348 | 0.01124238  |
| 8174351 | <i>NUP62CL</i>  | -2.262157  | 0.048474442 |
| 8150698 | <i>SNAI2</i>    | -2.2736783 | 0.047932636 |
| 7926037 | <i>PFKFB3</i>   | -2.2894857 | 0.033096205 |
| 8085475 | <i>WNT7A</i>    | -2.3042505 | 0.029058207 |
| 8086961 | <i>PFKFB4</i>   | -2.3127549 | 0.00492768  |
| 8057578 | <i>CALCRL</i>   | -2.3291035 | 0.013531334 |
| 7943984 | <i>ZBTB16</i>   | -2.3384817 | 2.38E-04    |

|         |                |            |             |
|---------|----------------|------------|-------------|
| 8152946 | <i>KCNQ3</i>   | -2.347841  | 0.01136561  |
| 7972567 | <i>ZIC5</i>    | -2.3683083 | 3.41E-04    |
| 8001800 | <i>CDH11</i>   | -2.3777068 | 0.035105314 |
| 8096511 | <i>BMPRI1B</i> | -2.3881023 | 0.033132683 |
| 8086185 | <i>PLCD1</i>   | -2.393508  | 0.004501432 |
| 8175269 | <i>FAM122B</i> | -2.4087105 | 0.009665375 |
| 7934278 | <i>P4HAI</i>   | -2.4218552 | 0.022610115 |
| 8101788 | <i>UNC5C</i>   | -2.5003495 | 0.005092559 |
| 7942123 | <i>CCND1</i>   | -2.5150073 | 0.010116734 |
| 7928308 | <i>DDIT4</i>   | -2.5195851 | 0.0120356   |
| 7936734 | <i>FGFR2</i>   | -2.53189   | 0.006118621 |
| 7922994 | <i>FAM5C</i>   | -2.5483663 | 0.04084279  |
| 7961829 | <i>BCAT1</i>   | -2.549485  | 0.0295037   |
| 7972239 | <i>SLITRK6</i> | -2.5549057 | 0.029793974 |
| 7973743 | <i>BNIP3</i>   | -2.5826774 | 0.001452661 |
| 8072926 | <i>HIF0</i>    | -2.6044066 | 0.029549332 |
| 8156770 | <i>GALNT12</i> | -2.623051  | 0.0460108   |
| 7969815 | <i>CLYBL</i>   | -2.6363177 | 0.016043475 |
| 7921099 | <i>CRABP2</i>  | -2.6384778 | 0.001010158 |
| 7937079 | <i>BNIP3</i>   | -2.662988  | 0.002951976 |
| 8149071 | <i>ANGPT2</i>  | -2.6950092 | 0.04441186  |
| 8166469 | <i>SAT1</i>    | -2.7259684 | 0.001622605 |
| 7916493 | <i>PPAP2B</i>  | -2.7356348 | 0.002484496 |
| 7938975 | <i>SLC17A6</i> | -2.7537792 | 0.001068092 |
| 8064978 | <i>JAG1</i>    | -2.7545347 | 0.02699388  |
| 8081001 | <i>ROBO2</i>   | -2.7771685 | 5.60E-05    |
| 8082066 | <i>FAM162A</i> | -2.8157492 | 3.28E-04    |
| 8095110 | <i>KIT</i>     | -2.892008  | 0.023102356 |
| 7901993 | <i>CACHD1</i>  | -2.9385476 | 0.005644539 |
| 8153002 | <i>NDRG1</i>   | -2.9619658 | 0.002201587 |

|         |                 |            |             |
|---------|-----------------|------------|-------------|
| 8119898 | <i>VEGFA</i>    | -2.971548  | 0.013201094 |
| 8046078 | <i>B3GALT1</i>  | -2.980435  | 0.019020619 |
| 7897737 | <i>C1orf187</i> | -3.07386   | 0.02668419  |
| 7939559 | <i>TSPAN18</i>  | -3.0823834 | 0.007901136 |
| 8082574 | <i>TRH</i>      | -3.0963366 | 0.023394002 |
| 7955974 | <i>NEUROD4</i>  | -3.1097238 | 0.003727583 |
| 7909064 | <i>CNTN2</i>    | -3.391643  | 0.03556373  |
| 8055465 | <i>CXCR4</i>    | -3.400361  | 0.001582446 |
| 8112053 | <i>CDC20B</i>   | -3.4845676 | 0.02614936  |
| 7969830 | <i>ZIC2</i>     | -3.5606766 | 1.66E-04    |
| 8046408 | <i>PDK1</i>     | -3.5723302 | 0.004284957 |
| 8042942 | <i>HK2</i>      | -3.5868874 | 0.002930633 |
| 7925876 | <i>PFKP</i>     | -3.6496274 | 0.00645205  |
| 8149825 | <i>STC1</i>     | -3.8289537 | 0.002052822 |
| 7915472 | <i>SLC2A1</i>   | -3.8315654 | 2.72E-04    |
| 8013660 | <i>ALDOC</i>    | -3.9018507 | 0.002411329 |
| 8102368 | <i>NEUROG2</i>  | -4.047714  | 0.012370324 |
| 7962183 | <i>AK3L1</i>    | -4.0585384 | 8.91E-05    |
| 8078286 | <i>RARB</i>     | -4.1241055 | 0.023108592 |
| 8097773 | <i>MAB21L2</i>  | -4.2520766 | 0.047678325 |
| 8174444 | <i>IRS4</i>     | -4.2642846 | 0.005260202 |
| 8088485 | <i>FEZF2</i>    | -4.3277993 | 0.04564055  |
| 8102232 | <i>LEF1</i>     | -6.078532  | 0.00354995  |
| 7947338 | <i>PAX6</i>     | -6.092     | 0.014800102 |

**Table S3:** Gene expression array data of significantly up- and down-regulated

genes of sorted day 28 cells compared with day 42 cells. The genes whose

expression levels were higher (> 2-fold) in the fetal VM compared to the fetal

dorsal mesencephalon are selected.

| Transcripts Cluster Id | Gene symbol     | Fold Change | P value     |
|------------------------|-----------------|-------------|-------------|
| 8140984                | <i>HEPACAM2</i> | 3.9891236   | 0.002473559 |
| 8088180                | <i>WNT5A</i>    | 3.7547162   | 6.46E-04    |
| 8100154                | <i>CORIN</i>    | 3.4526668   | 0.005539011 |
| 8088560                | <i>ADAMTS9</i>  | 3.2472312   | 3.84E-04    |
| 7968678                | <i>FREM2</i>    | 3.2326806   | 9.51E-04    |
| 8139640                | <i>DDC</i>      | 2.7158241   | 0.019403007 |
| 8144078                | <i>SHH</i>      | 2.419754    | 3.56E-04    |
| 8149592                | <i>SLC18A1</i>  | 2.351122    | 0.003352632 |
| 8152522                | <i>ENPP2</i>    | 2.2268987   | 0.009217289 |
| 7962312                | <i>ABCD2</i>    | 2.2089314   | 0.011514991 |
| 8096489                | <i>PDLIM5</i>   | 2.0749063   | 8.30E-05    |
| 8083223                | <i>C3orf58</i>  | 2.0498207   | 0.021859845 |
| 7933933                | <i>DNAJC12</i>  | -2.0034456  | 0.030143498 |
| 7948588                | <i>SYT7</i>     | -2.03904    | 3.21E-04    |
| 8162216                | <i>SHC3</i>     | -2.0780237  | 6.88E-04    |
| 8101757                | <i>GPRIN3</i>   | -2.0867722  | 0.022475641 |
| 8075616                | <i>SYN3</i>     | -2.0903604  | 0.004095479 |
| 7965040                | <i>PHLDA1</i>   | -2.1291502  | 0.001350848 |
| 7909789                | <i>TGFB2</i>    | -2.148723   | 0.035826754 |
| 8146403                | <i>SNTG1</i>    | -2.1580215  | 0.008335051 |
| 8134463                | <i>NPTX2</i>    | -2.1630187  | 0.011281536 |
| 7929373                | <i>LGII</i>     | -2.2057762  | 0.027242837 |
| 7927120                | <i>RET</i>      | -2.226918   | 0.003354378 |

|         |                 |            |             |
|---------|-----------------|------------|-------------|
| 7930837 | <i>SLC18A2</i>  | -2.3051424 | 0.00456127  |
| 7920123 | <i>S100A10</i>  | -2.3165731 | 0.03491729  |
| 7951662 | <i>CRYAB</i>    | -2.3638616 | 0.001891354 |
| 8021301 | <i>RAB27B</i>   | -2.4572883 | 0.030119164 |
| 7930341 | <i>SORCS3</i>   | -2.474262  | 0.004962535 |
| 8092578 | <i>ETV5</i>     | -2.5377958 | 0.017145246 |
| 8101659 | <i>SPARCL1</i>  | -2.6847594 | 0.003016697 |
| 7945712 | <i>TH</i>       | -2.8422818 | 0.001948763 |
| 8175195 | <i>HS6ST2</i>   | -3.0999072 | 0.001448546 |
| 8098439 | <i>EPCAM</i>    | -3.1291287 | 0.023850063 |
| 8149835 | <i>NEFL</i>     | -3.1964908 | 6.38E-04    |
| 7971937 | <i>KLHL1</i>    | -3.2236753 | 0.035931613 |
| 8070279 | <i>KCNJ6</i>    | -3.2937126 | 0.002665549 |
| 8106088 | <i>CARTPT</i>   | -3.3537612 | 0.017565785 |
| 8177620 | <i>CARTPT</i>   | -3.3564627 | 0.017597582 |
| 8169598 | <i>ZCCHC12</i>  | -3.5249903 | 0.001707703 |
| 7922482 | <i>TNR</i>      | -3.60874   | 5.37E-04    |
| 8094901 | <i>GABRB1</i>   | -4.1370163 | 0.004160109 |
| 7979721 | <i>C14orf83</i> | -4.500512  | 1.37E-04    |
| 7982102 | <i>GABRA5</i>   | -4.5943813 | 0.001458439 |
| 8023828 | <i>NETO1</i>    | -5.4121256 | 0.00112521  |

**Table S4:** Genes of highly expressed either in day 28 and day 42-sorted cells, and human ventral mesencephalon (hVM). The genes whose expression levels were higher (> 2-fold) in the fetal VM compared to the fetal dorsal mesencephalon are selected.

*PLXDC2*

*SLIT1*

*SPON1*

*PTPRO*

*FOXA1*

*NTN1*

*ABCA8*

*CFC1B*

*NR4A2*

*IGFBP5*

*SULF2*

*ALCAM*

*C3orf58*

*ADAMTS9*

*SLIT2*

*CORIN*

*CHN2*

*SHH*

*SULF1*

*NEFL*

*CALB1*

**Table S5:** Q-PCR primers. Lists of primers used for quantitative RT-PCR.

| Gene             | Forward                    | Reverse                       |
|------------------|----------------------------|-------------------------------|
| <i>OCT3/4</i>    | AGACCATCTGCCGCTTTGAG       | GCAAGGGCCGCAGCTT              |
| <i>NANOG</i>     | GGCTCTGTTTTGCTATATCCCCTAA  | CATTACGATGCAGCAAATACGAGA      |
| <i>SOX1</i>      | GCGGAGCTCGTCGCATT          | GCGGTAACAACACTACAAAAAAGTTGTAA |
| <i>SOX17</i>     | CGCTTTCATGGTGTGGGCTAAGGACG | TAGTTGGGGTGGTCCTGCATGTGCTG    |
| <i>BRACHYURY</i> | TCACAAAGAGATGATGGAGGAAC    | GATGAGGATTTGCAGGTGGA          |
| <i>hGSC</i>      | GAGGAGAAAGTGGAGGTCTGGTT    | CTCTGATGAGGACCGCTTCTG         |
| <i>MAP2</i>      | GGATCAACGGAGAGCTGAC        | TCAGGACTGCTACAGCCTCA          |
| <i>NURR1</i>     | CGAAACCGAAGAGCCCACAGGA     | GGTCATAGCCGGTGGAGTCG          |
| <i>LMX1A</i>     | GATCCCTCCGACAGGGTCTC       | GGTTCCCACTCTGGACTGC           |
| <i>FOXA2</i>     | TTCAGGCCCGGCTAACTCT        | AGTCTCGACCCCCACTTGCT          |
| <i>OTX2</i>      | GATGAGGATTTGCAGGTGGA       | CCCGAGCTGGAGATGTCTTC          |
| <i>GBX2</i>      | GGTAACTTCGACAAGGCGGAGG     | GGTCGTCTCCACCTTTGACTCG        |
| <i>SIX3</i>      | CCGGAAGAGTTGTCCATGTTC      | CGACTCGTGTTTGTGATGGC          |
| <i>EN1</i>       | TGGGTGTACTGCACACGTTATTC    | GGAACCTCCGCCTTGAGTCTCT        |
| <i>TH</i>        | TCATCACCTGGTCACCAAGTT      | GGTCGCCGTGCCTGTACTION         |
| <i>GAPDH</i>     | GGTCGGAGTCAACGGATTTG       | TCAGCCTTGACGGTGCCATG          |



**Table S6:** Primary antibodies used for immunofluorescence studies. Lists of primary antibodies used for immunofluorescence studies.

| Antibody                          | Dilution | Supplier                      |
|-----------------------------------|----------|-------------------------------|
| Mouse anti-CORIN                  | 1:200    | Donated by the KAN laboratory |
| Hamster anti-LMX1A                | 1:200    | Donated by the KAN laboratory |
| Rabbit anti-TH                    | 1:400    | Millipore Chemicon            |
| Sheep anti-TH                     | 1:200    | Millipore Chemicon            |
| Mouse anti-TUJ1                   | 1:300    | Convance Research Products    |
| Mouse anti-NESTIN, human specific | 1:100    | Millipore Chemicon            |
| Rabbit anti-AADC                  | 1:100    | Protos Biotech                |
| Rabbit anti-GIRK2                 | 1:200    | Alomone labs                  |
| Rat anti-NURR1                    | 1:1000   | Donated by the KAN laboratory |
| Rabbit anti-KI67                  | 1:1000   | Novocastra                    |
| Goat anti-FOXA2                   | 1:500    | SantaCruz                     |
| Goat anti-OTX2                    | 1:200    | R&D                           |
| Rat anti-SEROTONIN                | 1:100    | Millipore Chemicon            |
| Rabbit anti-PITX3                 | 1:200    | Millipore Chemicon            |
| Mouse anti-NEUN                   | 1:100    | Millipore Chemicon            |
| Mouse anti-HNA                    | 1:500    | Millipore Chemicon            |
